# Supplementary material for: One-step synthesis of glycoprotein mimics in vitro: improvement of protein activity, stability and application in CPP hydrolysis
Source: Royal Society of Chemistry journal article supplement (doi:10.1039/c6tb01251e), 2016-01-01
Supplement: c6tb01251e1.pdf [file c6tb01251e1.pdf]

## Supporting Information

# One-step synthesis of glycoprotein mimics *in vitro*: improvement of protein activity, stability and application in CPP hydrolysis

Yuecheng Cui,<sup>a</sup> Zhenhua Li,<sup>a</sup> Lei Wang,<sup>a</sup> Feng Liu,<sup>a</sup> Yuqi Yuan,<sup>a</sup> Hongwei Wang,<sup>\*a</sup>

Lulu Xue,<sup>a</sup> Jingjing Pan,<sup>a</sup> Gaojian Chen,<sup>b</sup> Hong Chen<sup>a</sup> and Lin Yuan<sup>\*a</sup>

*a* State and Local Joint Engineering Laboratory for Novel Functional Polymeric Materials, College of Chemistry, Chemical Engineering and Materials Science, Soochow University, 199 Ren'ai Road, Suzhou 215123, P. R. China.

*b* Center for Soft Condensed Matter Physics and Interdisciplinary Research, Soochow University, Suzhou 215006, P. R. China

E-mail: wanghw@suda.edu.cn; yuanl@suda.edu.cn

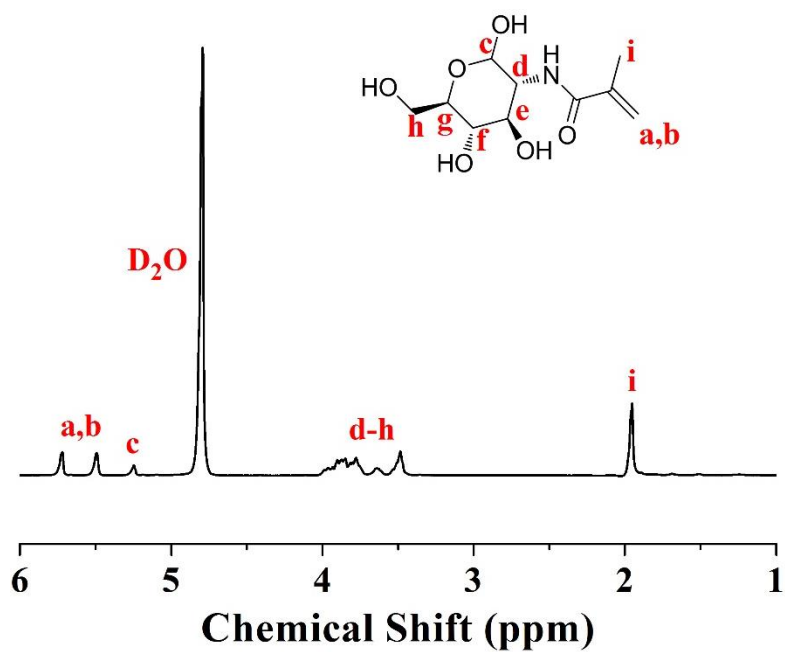

Fig. S1  $^1\text{H}$  NMR spectrum of MAG. Solvent:  $\text{D}_2\text{O}$ .

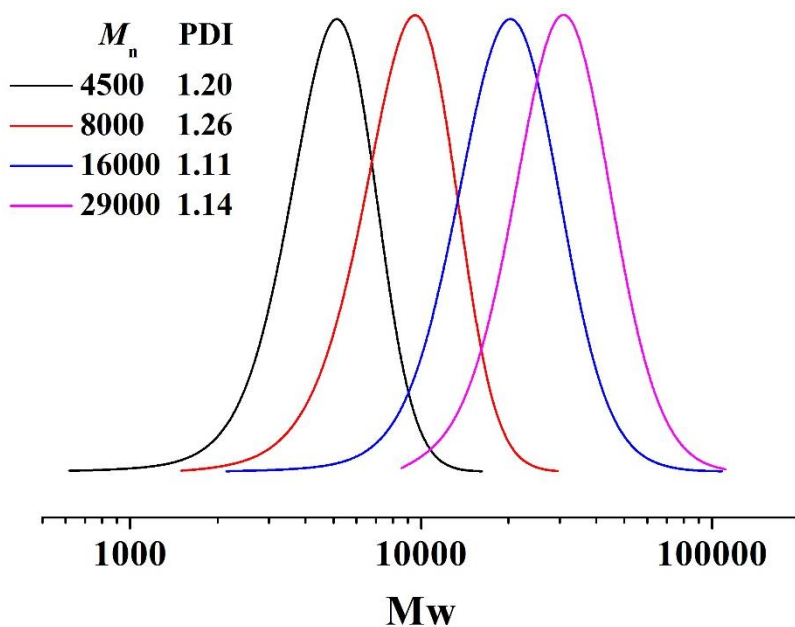

Fig. S2 Aqueous GPC of PMAG with increasing molecular weight.

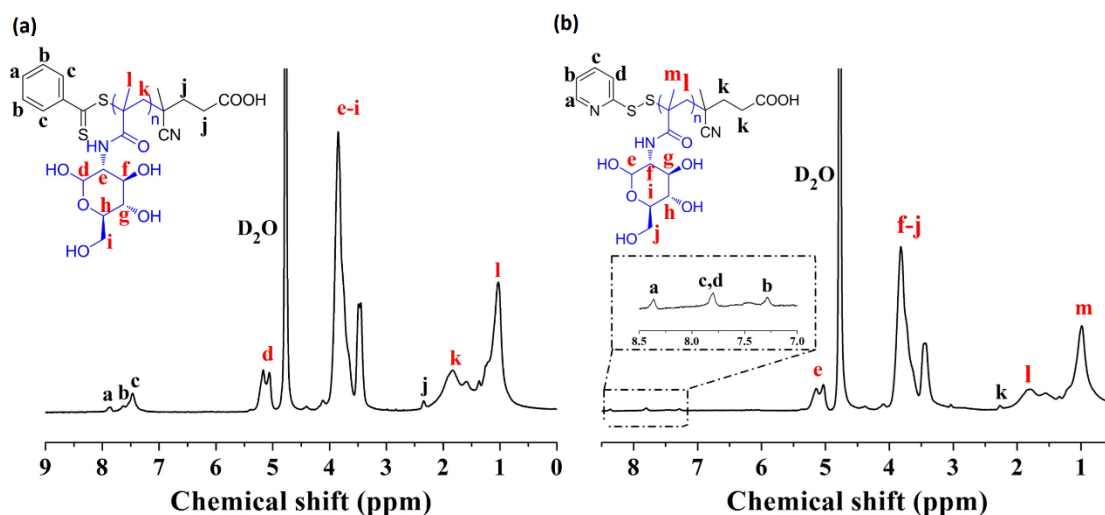

**Fig. S3**  $^1\text{H}$  NMR of PMAG (a) and the corresponding pyridyl-PMAG (b). Solvent:  $\text{D}_2\text{O}$ . The conversion of pyridyl-PMAG was calculated as below<sup>1,2</sup>:

$$\text{Conversion (\%)} = \frac{\delta_{8.4\text{ppm}}}{\delta_{2.5\text{ppm}}/2} \times 100\% = 95.28\%$$

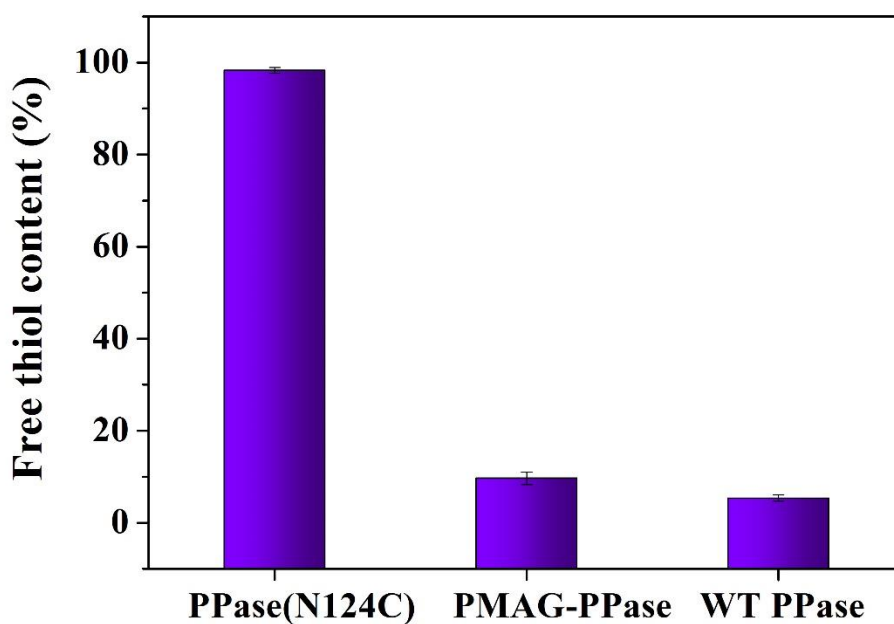

**Fig. S4** Free thiol content of PPase(N124C), PMAG-PPase conjugates (after purification) and WT (wild type) PPase (Mean  $\pm$  SD, n = 3). The conversion of conjugate was calculated as below:

$$\text{Conversion (\%)} = \frac{A_{\text{N124C-APMAG-PPase}}}{A_{\text{N124C-AWT-PPase}}} \times 100\% = \frac{98.26-9.68}{98.26-5.36} \times 100\% = 95.35\%$$

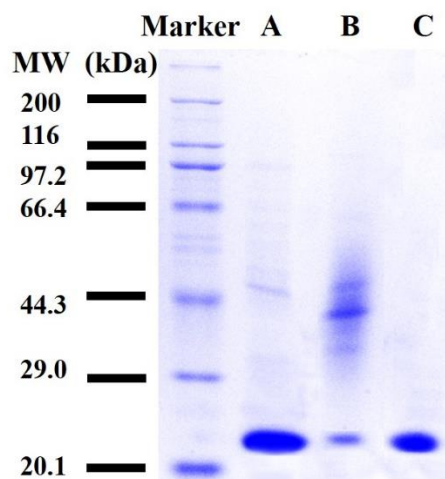

**Fig. S5** SDS-PAGE result. Lane M: molecular weight markers; lane A: PPase; lane B: PMAG-PPase conjugate (PM<sub>2</sub>-PPase); lane C: conjugate reduced by DTT.

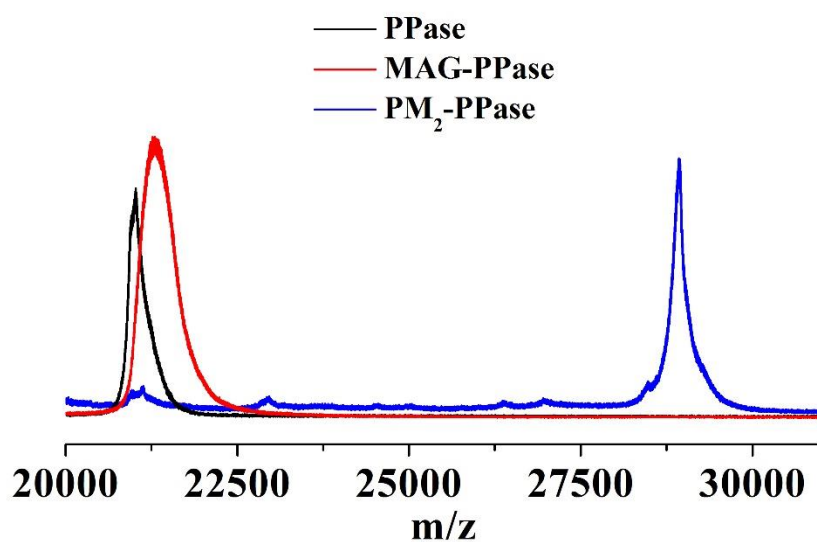

**Fig. S6** MALDI-TOF mass of PPase, MAG-PPase and PM<sub>2</sub>-PPase. MAG-PPase conjugate was synthesized via thiol-ene click chemistry according to Cobo *et al.*<sup>3</sup> The process was similar with the synthesis of PMAG-conjugates, which the feed molar ratio of MAG/PPase was 50/1, reacted in 10 mM Tris-HCl buffer (pH 8.0) and measured via MALDI-TOF mass.

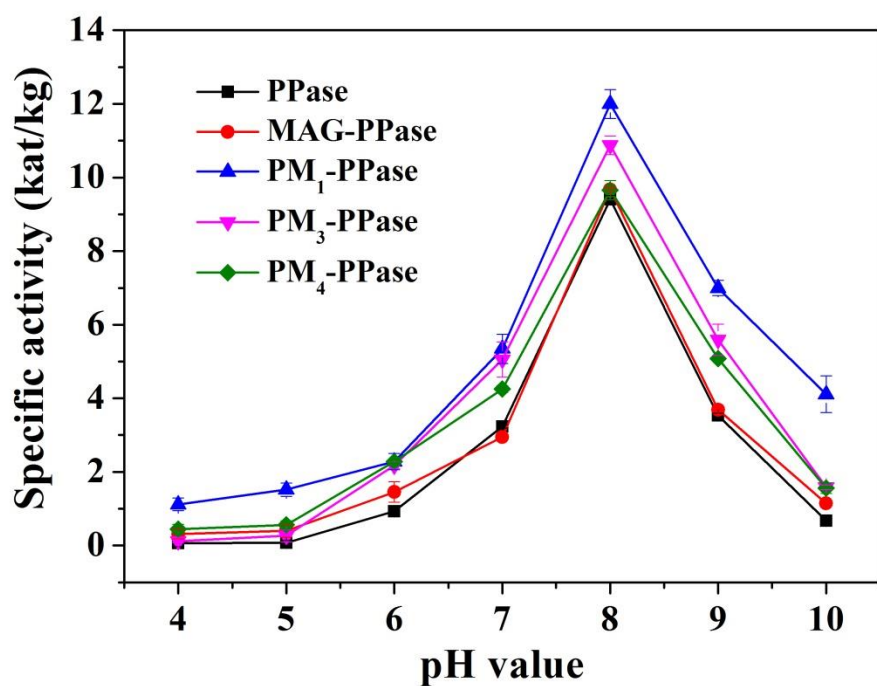

**Fig. S7** Specific activities vs. pH value of free PPase, MAG-PPase and PMAG-PPase conjugates of different PMAG molecular weight ( $M_n(\text{PMAG}) = 4.5, 16.0, \text{ and } 29.0$  kDa for PM<sub>1</sub>, PM<sub>3</sub>, and PM<sub>4</sub> respectively) as a function of pH value. Mean  $\pm$  SD, n = 3.

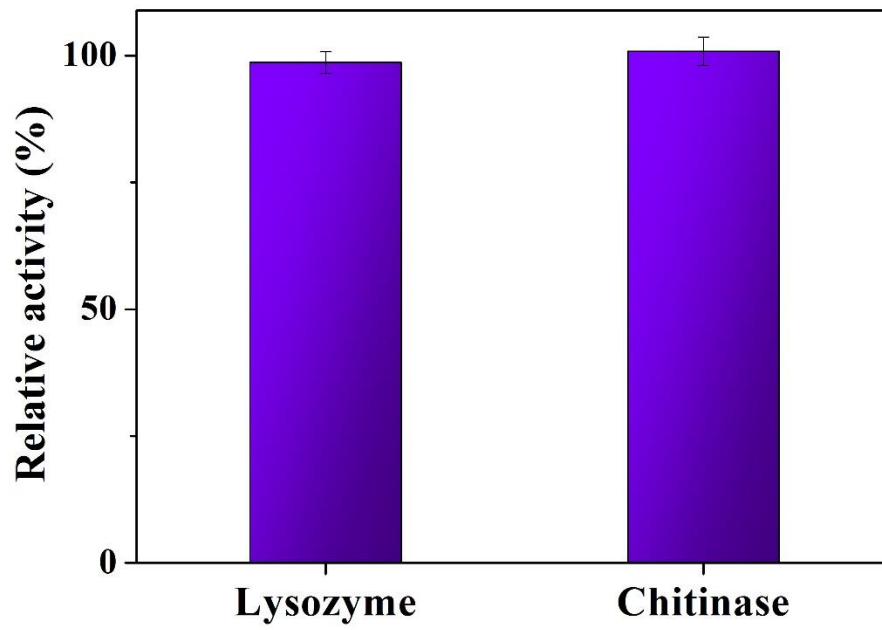

**Fig. S8** Tolerance of PM<sub>2</sub>-PPase conjugate to lysozyme and chitinase digestion (relative to the specific activity of PM<sub>2</sub>-PPase without the incubation of glycosidases, Mean  $\pm$  SD, n = 3).

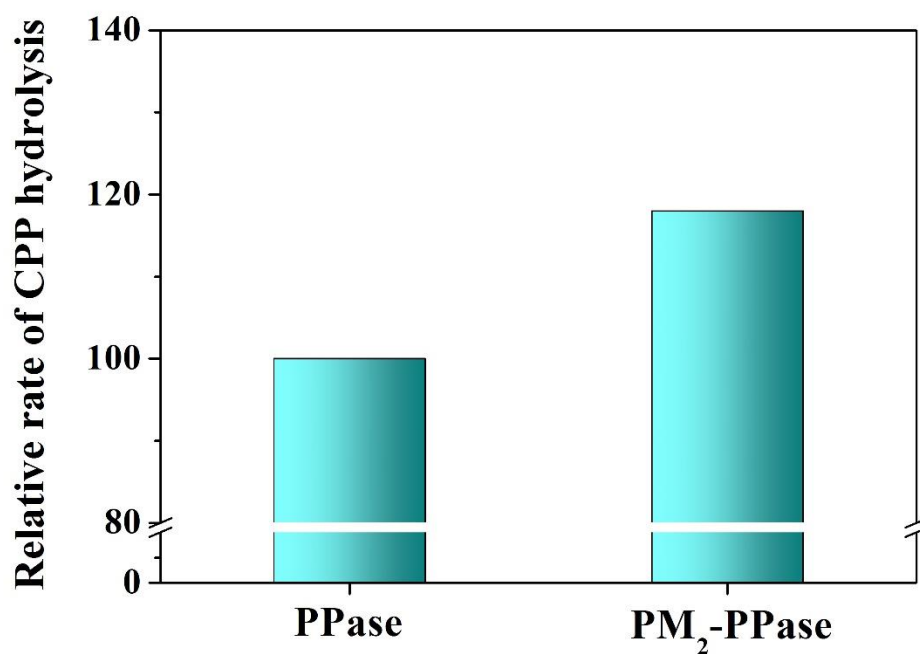

**Fig. S9** Relative rate of CPP hydrolysis using PPase and PM<sub>2</sub>-PPase, respectively (relative to the hydrolysis rate of unconjugated PPase).

### References

- 1 C. Boyer, V. Bulmus and T. P. Davis, *Macromol. Rapid Commun.*, 2009, **30**, 493-497.
- 2 C. Boyer, A. Granville, T. P. Davis and V. Bulmus, *J. Polym. Sci. Part A: Polym. Chem.*, 2009, **47**, 3773-3794.
- 3 I. Cobo, M. Li, B. S. Sumerlin and S. Perrier, *Nat. Mater.* 2015, **14**, 143-159.
